# Supplementary material for: Grain boundary and misorientation angle-dependent thermal transport in single-layer MoS2
Source: Royal Society of Chemistry journal article supplement (doi:10.1039/d1nr05113j), 2021-12-23
Supplement: d1nr05113j1.pdf [file d1nr05113j1.pdf]

## Supporting Information

### **Grain Boundary and Misorientation Angle Dependent Thermal Transport in Single-layer MoS<sub>2</sub>**

Ke Xu,<sup>1</sup> Ting Liang,<sup>2</sup> Zhisen Zhang,<sup>1</sup> Xuezheng Cao,<sup>1</sup> Meng Han,<sup>2</sup> Ning Wei<sup>3,\*</sup> and Jianyang Wu<sup>1,4,\*</sup>

<sup>1</sup>Department of Physics, Research Institute for Biomimetics and Soft Matter, Jiujiang Research Institute and Fujian Provincial Key Laboratory for Soft Functional Materials Research, Xiamen University, Xiamen 361005, PR China

<sup>2</sup>Shenzhen Institute of Advanced Electronic Materials, Shenzhen Institute of Advanced Technology, Chinese Academy of Sciences, Shenzhen 518055, China

<sup>3</sup>Jiangsu Key Laboratory of Advanced Food Manufacturing Equipment and Technology, Jiangnan University, 214122, Wuxi, China

<sup>4</sup>NTNU Nanomechanical Lab, Norwegian University of Science and Technology (NTNU), Trondheim 7491, Norway

---

\* Corresponding authors: weining@mail.tsinghua.edu.cn; jianyang@xmu.edu.cn

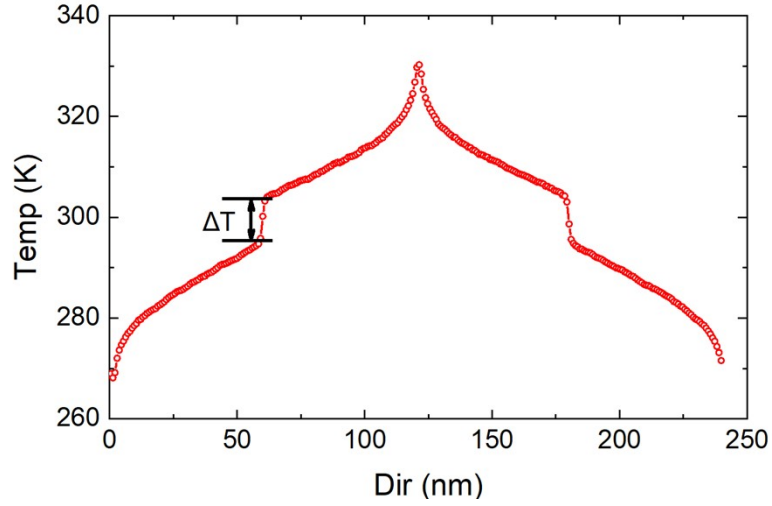

**Figure S1** Typical temperature distribution profiles perpendicular to the GBs predicted from RNEMD simulations

Table S1 The GB tilt angle  $\theta$ , Kapitza resistance  $R$ , grain boundary line tension  $\gamma$ , and defect density  $\rho$  for the GB SLMoS<sub>2</sub> samples considered here

| Armchair-oriented GBs |                |                                           |                   |                                         |                   | Zigzag-oriented GBs |                                           |                |                   |
|-----------------------|----------------|-------------------------------------------|-------------------|-----------------------------------------|-------------------|---------------------|-------------------------------------------|----------------|-------------------|
| Mo5 7 GBs             |                |                                           |                   | S5 7 GBs                                |                   |                     |                                           |                |                   |
| $\theta$ (°)          | $\rho$<br>1/nm | $R$<br>m <sup>2</sup> ·K·GW <sup>-1</sup> | $\gamma$<br>eV/nm | $R$<br>m <sup>2</sup> ·KW <sup>-1</sup> | $\gamma$<br>eV/nm | $\theta$ (°)        | $R$<br>m <sup>2</sup> ·K·GW <sup>-1</sup> | $\rho$<br>1/nm | $\gamma$<br>eV/nm |
| 21.98                 | 1.19           | 1.24                                      | 6.62              | 1.40                                    | 4.23              | 31.78               | 2.51                                      | 1.77           | 6.50              |
| 18.82                 | 1.00           | 1.05                                      | 6.31              | 1.17                                    | 4.26              | 38.05               | 1.66                                      | 1.37           | 6.05              |
| 17.96                 | 0.97           | 1.06                                      | 6.12              | 0.96                                    | 4.17              | 42.03               | 1.20                                      | 1.13           | 5.72              |
| 16.46                 | 0.90           | 0.85                                      | 5.79              | 0.92                                    | 4.00              | 44.78               | 1.04                                      | 0.96           | 5.37              |
| 13.16                 | 0.72           | 0.73                                      | 4.89              | 0.84                                    | 3.47              | 46.80               | 0.91                                      | 0.83           | 5.08              |
| 9.40                  | 0.52           | 0.53                                      | 3.93              | 0.68                                    | 2.90              | 48.35               | 0.88                                      | 0.74           | 4.89              |
| 7.31                  | 0.37           | 0.43                                      | 3.32              | 0.54                                    | 2.52              | 49.57               | 0.80                                      | 0.66           | 4.66              |
| 5.98                  | 0.33           | 0.32                                      | 2.89              | 0.36                                    | 2.23              | 51.38               | 0.65                                      | 0.55           | 4.26              |
| 5.06                  | 0.26           | 0.24                                      | 2.49              | 0.29                                    | 2.00              | 52.65               | 0.45                                      | 0.47           | 3.86              |

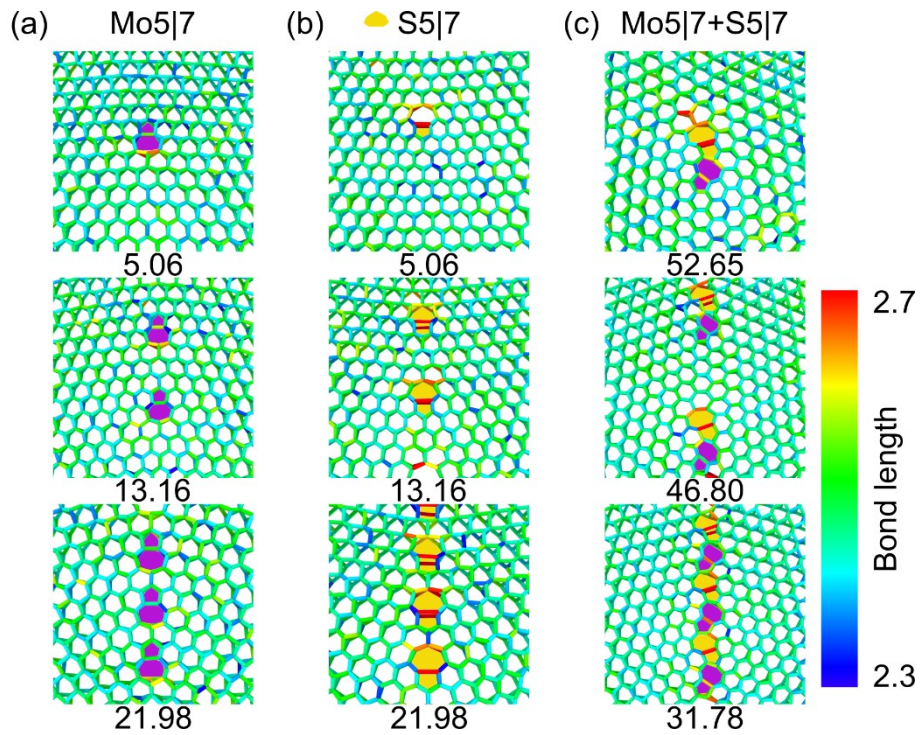

**Figure S2** Deformation of bond configuration at GB regions. (a)-(c) Contours of bond length of Mo5|7, S5|7 and Mo5|7+S5|7 dislocation-dominated GBs with three different misorientation angles ( $\theta$ ), respectively.

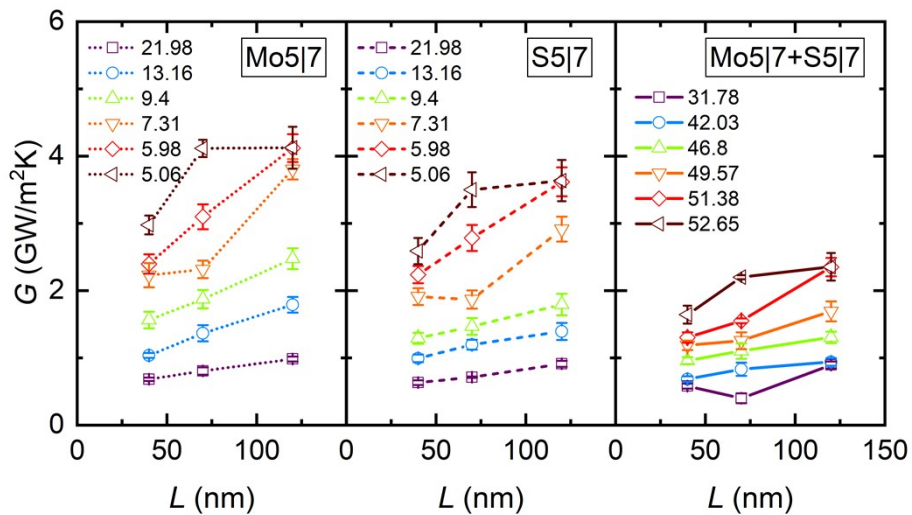

**Figure S3** Thermal conductance  $G$  as a function of the length of crystalline grains of bicrystals with different misorientation angle of GBs. The dot/solid/dashed line indicates the Mo5|7/S5|7/Mo5|7+S5|7-oriented GBs.

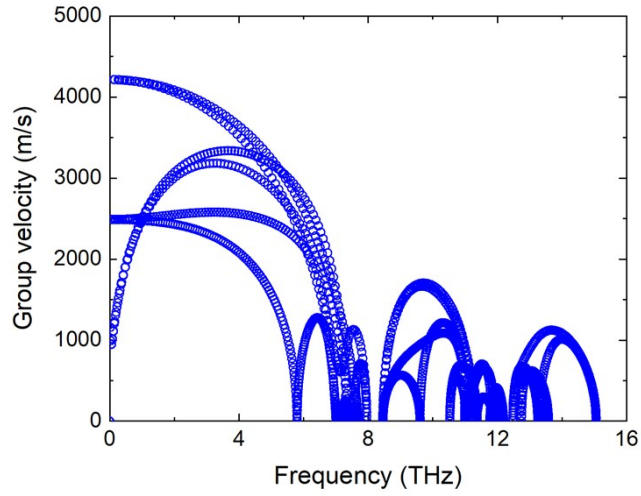

**Figure S4** Phonon group velocity of pristine single-layer MoS<sub>2</sub>

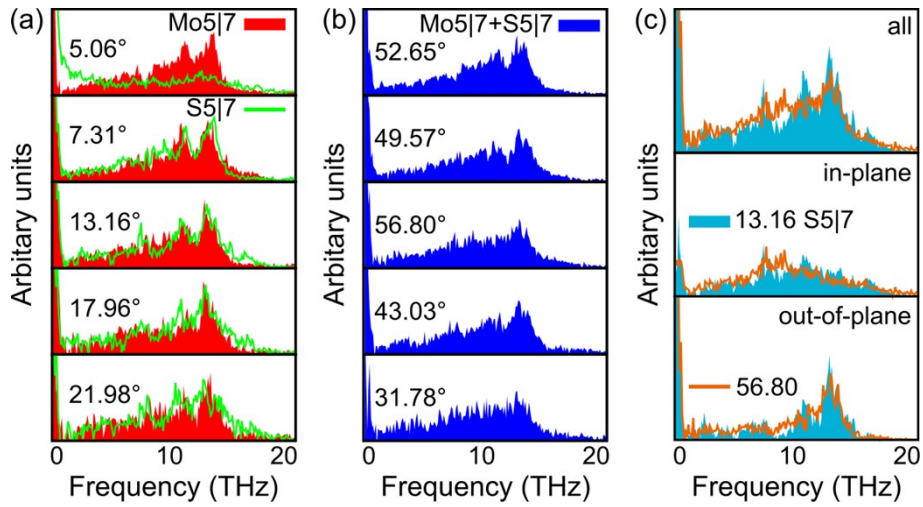

**Figure S5** Phonon vibrational density of state ( $\nu$ DOS) of single-layer MoS<sub>2</sub> bicrystals. (a) and (c)  $\nu$ DOS of Mo5|7 and Mo5|7+S5|7 dislocation-dominated MoS<sub>2</sub> bicrystals with five different misorientation angles ( $\theta$ ), respectively. (b) and (d) Comparison of total, in-plane and out-of-plane  $\nu$ DOS of MoS<sub>2</sub> bicrystals between Mo5|7 and S5|7, Mo5|7 and Mo5|7+S5|7 dislocation-dominated GBs, respectively.

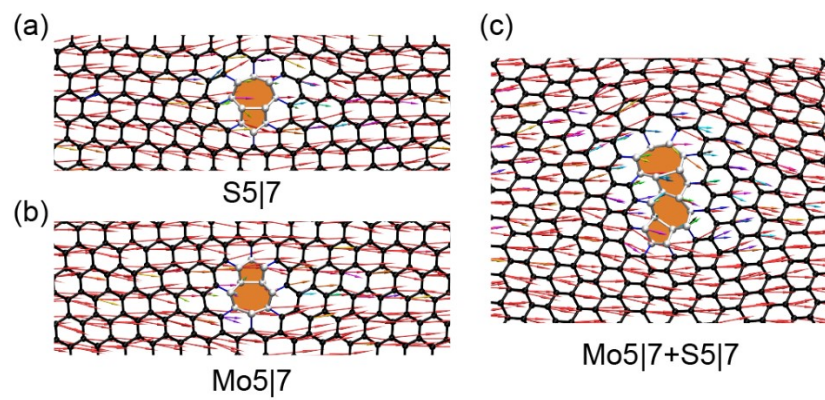

Figure S6 Microscopic heat flux by vectors in  $5|7$  dislocation-contained  $\text{SLMoS}_2$
